# 1 The use of newborn foot length to identify low birth 2 weight and preterm babies in Papua New Guinea: A 3 diagnostic accuracy study

4 Alice Mengi<sup>1</sup> Lisa M Vallely<sup>2,3</sup>, Moses Laman<sup>4</sup>, Eunice Jally<sup>1</sup>, Janeth Kulimbao<sup>1</sup>, Sharon Ware<sup>1</sup>, Regina  
5 Enman<sup>1</sup>, Jimmy Aipit<sup>5</sup>, Nicola Low<sup>6\*</sup>, Michaela Riddell<sup>1,3</sup>.

- 6 1. Department of Infection and Immunity, Papua New Guinea Institute of Medical Research,  
7 Madang, Papua New Guinea  
8 2. Sexual and Reproductive Health Unit, Papua New Guinea Institute of Medical Research, Madang,  
9 Papua New Guinea  
10 3. Global Health Program, The Kirby Institute, University of New South Wales, Sydney, Australia  
11 4. Department of Infection and Immunity, Papua New Guinea Institute of Medical Research,  
12 Goroka, Papua New Guinea  
13 5. Madang Provincial Health Authority, Madang, Papua New Guinea  
14 6. Institute of Social and Preventive Medicine, University of Bern, Bern, Switzerland

15 \* Corresponding author

16 E-mail: [nicola.low@ispm.unibe.ch](mailto:nicola.low@ispm.unibe.ch) (NL)

17

## 18 Abstract

19 Low birth weight (LBW, <2.50 kg) and preterm birth (PTB, <37 completed weeks of  
20 gestation) are important contributors to neonatal death. Newborn foot length has been assessed to  
21 identify LBW and PTB babies in Asia and Africa. The objectives of this observational study were to  
22 determine the diagnostic accuracy of foot length to identify LBW and PTB and to compare foot  
23 length measurements of a researcher with those of trained volunteers in Papua New Guinea.  
24 Newborn babies were enrolled prospectively with written informed consent from their mothers,  
25 who were participating in a clinical trial in Madang Province. The reference standards were birth  
26 weight, measured by electronic scales and gestational age at birth, based on ultrasound scan and  
27 last menstrual period at the first antenatal visit. Newborn foot length was measured within 72 hours  
28 of birth with a firm plastic ruler. Optimal foot length cut-off values for LBW and PTB were derived  
29 from receiver operating characteristic curve analysis. Bland-Altman analysis was used to assess inter-  
30 observer agreement between researcher and volunteer. From 12 October 2019 to 6 January 2021,  
31 we enrolled 342 newborns (80% of those eligible); 21.1% (72/342) were LBW and 7.3% (25/342)  
32 were PTB. The area under the curve for LBW was 87.0% (95% confidence intervals 82.8-90.2) and for  
33 PTB 85.6% (81.5-89.2). The optimal foot length cut-off was <7.7 cm for both LBW (sensitivity 84.7%,  
34 74.7-91.2, specificity 69.6%, 63.9-74.8) and PTB (sensitivity 88.0% (70.0-95.8), specificity 61.8%  
35 (56.4-67.0). In 123 babies with paired measurements, the mean difference between the researcher  
36 and volunteer measurements was 0.07 cm (95% limits of agreement -0.55 to +0.70) and 7.3%  
37 (9/123) of the pairs were outside the 95% limits of agreement. When birth at a health facility is not  
38 possible, foot length measurement can identify LBW and PTB in newborns but needs appropriate  
39 training for community volunteers and evaluation of its impact on healthcare outcomes.

## 40 Introduction

41 Globally, complications of preterm birth (PTB), including low birth weight (LBW), are the  
42 leading cause of neonatal death in the first week of life [1]. Identifying the most vulnerable neonates  
43 so that they can receive timely essential care is challenging in resource-limited settings, particularly  
44 in rural areas or when births occur in the community [2]. Babies born LBW (<2.50 kg) [3] are either  
45 preterm (<37 completed weeks gestation) or small for gestational age (birth weight below the 10th  
46 percentile of the distribution for gestational age and sex) [3,4]. Many babies are, however, not  
47 weighed at birth [5] or their mothers have not had an adequate assessment during pregnancy to  
48 allow gestational age at birth to be calculated [2]. These assessments require reliable equipment and  
49 skilled, trained health workers to conduct ultrasound scans during pregnancy, measure birth weight  
50 accurately, or apply clinical assessments, such as Dubowitz or New Ballard scores [6].

51 Foot length is one of a range of anthropometric measures that have been used as proxies for LBW  
52 and PTB in resource-limited settings [6-18]. In a systematic review and meta-analysis of studies  
53 published between 2007 and 2020, Folger et al. found 19 studies, all conducted in south and south-  
54 east Asia and sub-Saharan Africa [19]. The authors found that a newborn foot length of <7.7cm had  
55 reasonable accuracy for identification of LBW babies in 3 studies in Asia (pooled sensitivity 87.6%,  
56 95% confidence interval, CI 55.7-97.5%, specificity 70.9%, 23.5-95.1%). They noted, however, that  
57 few studies used an accurate reference method for assessing gestational age and did not conduct a  
58 meta-analysis of foot length and PTB because of heterogeneity in study methods [19]. The optimal  
59 cut-off for newborn foot length may differ by country and region and performance characteristics  
60 could also vary, according to whether measurements are taken by clinically trained staff or  
61 community volunteers, field workers and care givers [11,20].

62 Papua New Guinea (PNG) is an island state in the South Pacific, which has one of the highest  
63 neonatal mortality rates in the world, with 22 newborn deaths per 1000 live births in 2020 [21,22].  
64 Although supervised delivery at a health facility is encouraged, uptake of antenatal care in PNG is

65 poor and high-risk babies cannot be easily identified and referred [21,23]. From 2016-2020, only  
66 around half of pregnant women in PNG had at least one antenatal visit and just over a third gave  
67 birth in a health facility. In Madang Province, about a third of pregnant women had at least one  
68 antenatal visit and about a quarter gave birth in a health facility [21]. The objectives of this study  
69 were to 1) determine the diagnostic accuracy of newborn foot length measurement to identify LBW  
70 or PTB babies in health facilities and community settings and 2) to compare foot length  
71 measurements taken by trained volunteers with those of a researcher to assess the feasibility of  
72 newborn foot length measurement in a community setting.

## 73 **Materials and methods**

74 The Neofoot (neonatal foot length) study was a prospective single arm diagnostic test  
75 accuracy study (S1 Protocol). We report the study using the Standards of Reporting of Diagnostic  
76 accuracy 2015 (supplement S1 Checklist). The study was conducted in three primary care clinics in  
77 Madang Province, PNG, which serve a total population of approximately 35,000, according to the  
78 2011 PNG National Census [24]. The study population included both people living in urban shanty  
79 settlements and rural subsistence farmers in areas with poor road conditions and difficult access to  
80 health facilities. The Neofoot study was designed as a sub-study of the Women And Newborn Trial of  
81 Antenatal Interventions and Management (WANTAIM) trial, a randomised controlled trial which  
82 assessed the effect of point-of-care testing and treatment of curable sexually transmitted infections  
83 and bacterial vaginosis during pregnancy on birth outcomes [25]. Women enrolled in the WANTAIM  
84 study were aged 16 years or older at a gestational age below 26 completed weeks, based on the  
85 date of the first day of the last menstrual period or an ultrasound scan performed by trained  
86 midwives at the first antenatal visit [26]. Their newborn babies were eligible for inclusion if the  
87 clinical researcher (AM) or senior study staff (EJ, JK, SW, RE) assessed them within 72 hours of birth,  
88 their general condition was stable and the baby did not have abnormalities. There were no  
89 additional exclusion criteria. At the first postnatal visit, the researcher or staff member used pictorial

90 diagrams to explain the Neofoot study in Tok-Pisin to consecutive women whom they attended,  
91 assessed their understanding of the study and answered questions. The mother or guardian gave a  
92 signature or thumbprint as informed consent for their baby to take part (S1 Protocol, page 20-21).  
93 For women who were unable to read or write, an independent witness was present during the  
94 consent procedures and also signed the consent form.

## 95 **Reference standards**

96 Birth weight was the average of two measurements taken at a 5 to 15 minute interval by  
97 trained WANTAIM clinical staff within 72 hours of birth using an electronic infant scale (Charder  
98 Cupid 1, Charder Medical, Taiwan) placed firmly on a hard surface and calibrated to zero [27]. Birth  
99 weight was before the index test on a separate clinical record form. LBW was defined as below 2.50  
100 kg [3]. Gestational age at birth was measured in completed weeks of pregnancy, calculated from the  
101 best obstetric estimate of the due date [26], using the date of the first day of the last menstrual  
102 period or an ultrasound scan (Logiq V2 portable ultrasound, GE Healthcare) performed by trained  
103 midwives at the first antenatal visit. Gestational age at birth was calculated at the time of statistical  
104 analysis. PTB was defined as birth before 37 completed weeks of pregnancy [4].

## 105 **Index test**

106 The index test was the length of the right foot, measured within 72 hours of birth. We  
107 calculated the average of two measurements, taken 5 to 15 minutes apart by the clinical researcher.  
108 Foot length was measured using a firm clear plastic 15cm ruler, bought from a local store and stuck  
109 to an A4-sized cardboard box, which was cut open (Fig 1). The tip of the ruler was pushed into a slit  
110 at the bottom of the box so that the zero level was at the base of the box. The researcher placed the  
111 right heel at the zero level and held the plantar surface of the foot against the ruler. Foot length at  
112 the tip of the hallux was measured to the nearest 1 mm, with a plastic setsquare perpendicular to  
113 the ruler.

114 **Fig 1. Measurement of newborn foot length.** Measurements were made with a 15cm clear plastic  
115 ruler stuck to the inside of a cardboard box. The zero mark of the ruler is at the base of the box. Foot  
116 length is measured from the base of the heel to the tip of the hallux.

## 117 **Training of volunteers**

118 To assess the feasibility of community members or village health workers identifying at risk  
119 babies, we enrolled nine volunteers, who were involved in the WANTAIM trial and were numerate  
120 and literate. The clinical researcher gave a half-day training session at the postnatal ward of Madang  
121 Provincial Hospital. The volunteers learned how to measure the baby's foot length, how to complete  
122 the case record form and practised both tasks.

## 123 **Measures to reduce the risk of bias**

124 To reduce the risk of measurement bias in foot length, the researcher and the volunteer  
125 recorded two measurements at a 5-to-15-minute interval. To ensure that the measurements were  
126 independent, the researcher and volunteer recorded their measurements on separate pages of the  
127 case record form and could not see the other person's record. Birth weight was measured before the  
128 index test on a separate clinical record form. The clinician researcher had access to clinical  
129 information about the newborn, but the best obstetric estimate of gestational age at birth [26] was  
130 calculated at the time of statistical analysis.

## 131 **Ethics approval**

132 The Neofoot study protocol was approved by the PNG Institute of Medical Research  
133 Institutional Review Board (IRB 1811) and the PNG Medical Research Advisory Committee (MRAC  
134 18.18). The WANTAIM study (ISRCTN37134032) received ethical approval from the Institutional  
135 Review Board of the PNG Institute of Medical Research (IRB number 1608); the Medical Research  
136 Advisory Committee of the PNG National Department of Health (MRAC number 16.24); the Human

137 Research Ethics Committee of the University of New South Wales (HREC number 16708); and the  
138 Research Ethics Committee of the London School of Hygiene and Tropical Medicine (REC number  
139 12009) [25].

## 140 **Data management**

141 Data were recorded on printed case record forms designed using TELEform™ Elite version  
142 10.5 (<https://teleform.software.informer.com/10.5/>). The case record forms were checked for  
143 discrepancies or out of range values and corrected before scanning, after which they were machine-  
144 read into a database (Microsoft). Variables collected from the mother at the first antenatal visit, as  
145 part of the WANTAIM study, included demographic details (province of birth, age, and marital  
146 status), gestational age at enrolment, estimated due date, haemoglobin, HIV test result  
147 (Determine™ HIV 1/2 Test), syphilis (SD Bioline, Abbott Diagnostics) results and use of betel nut,  
148 cigarettes, and alcohol during pregnancy. Data collected at the postnatal visit included date and  
149 place of birth, reason for giving birth at that location, newborn birth weight and sex of the baby.  
150 Data about foot length were the two measurements made by the researcher and the volunteers.

## 151 **Statistical analysis**

152 All statistical analyses used STATA (Stata 14.2 or 16, College Station, Texas, United States).  
153 For each newborn we calculated the gestational age at birth using the estimated due date  
154 established at the enrolment visit, and the average of the two measurements of birth weight and of  
155 foot length. The distributions of continuous variables were examined using histograms and  
156 described using the mean and standard deviation (SD) or median and interquartile range (IQR). For  
157 the classification of LBW and PTB, birth weight and gestational age at birth were dichotomised in  
158 accordance with the reference standard definitions.

159 We constructed receiver operating characteristics curves to display sensitivity against 1 minus  
160 specificity for the classification of LBW and PTB at each 1 mm increment in foot length from the

161 lowest to the highest value. We calculated the overall area under the curve and test performance  
162 characteristics sensitivity, specificity, positive and negative predictive values (as percentages with  
163 95% CI). We selected the optimal foot length cut-off, separately for LBW and PTB, as the value with  
164 the best balance of sensitivity and specificity, using the foot length cut-off with the highest area  
165 under the curve. For each baby for whom paired foot length measurements were available from the  
166 researcher and the volunteer, we assessed the level of agreement using Bland-Altman analysis [28].

## 167 **Sample size calculation**

168 The planned sample size was based on achieving an acceptable level of precision (95% CI +/-  
169 4 to 5%) for values of sensitivity from 70 to 90%. Using projected WANTAIM trial enrolment at the  
170 study clinics, we aimed to invite around 400 women to join the Neofoot study. Assuming 95% of  
171 babies had a postnatal visit within the first 72 hours and that 90% of mothers agreed to foot length  
172 measurement, the target was to have foot length measurements for 342 newborn babies.

## 173 **Results**

174 A total of 426 babies were born to 416 mothers enrolled in the WANTAIM trial from 12  
175 October 2019 to 6 January 2021. Of these, 84 babies were excluded from the study for reasons  
176 outlined in Fig 2. A total of 342 babies born (80.2% of those potentially eligible) to 335 mothers were  
177 enrolled. The study population included 10 of 14 twins born to 7 mothers; 3 mothers had both twins  
178 enrolled and four mothers had one twin enrolled (the other twin died before birth or before  
179 neonatal assessment). The researcher recorded foot length measurements for all 342 babies. Owing  
180 to disruptions during the COVID-19 pandemic and staff availability, a volunteer was available to  
181 measure foot length at the time of the postnatal assessment for 123 (36.0%) babies.

182

183 **Fig 2. Flow chart indicating number of mothers and newborn babies at each stage of the Neofoot**  
 184 **study.**

185 Among the 335 mothers, their mean age was 25.5 (SD 5.9, range 16-44) years, 43.9% (147/335) were  
 186 primiparous and 89.3% (299/335) were married (Table 1). Sixty-seven women attended one of the  
 187 primary care clinics covering urban shanty settlement areas and 268 attended clinics in rural areas.  
 188 Most women reported that they currently chewed betel nut (281/335, 83.9%) and about a quarter  
 189 were current smokers (81/335, 24.2%), but few (6/335, 1.8%) reported that they consumed alcohol  
 190 during pregnancy. Forty-two women 12.5% (42/335) had a positive test result for syphilis and 2  
 191 women (0.6%) had a positive test result for HIV. The mean haemoglobin concentration was 8.6 g/dL  
 192 (SD 1.6), nearly two thirds of women (63.9%; 214/335) had mild anaemia (haemoglobin 7.0–9.9  
 193 g/dL) and 13.7 % (46/335) had moderate to severe anaemia (haemoglobin <7.0 g/dL).

194 **Table 1. Characteristics of mothers whose newborn babies were enrolled in the study (N=335)**

| <b>Maternal characteristic</b> |                            | <b>Total N = 335</b> |
|--------------------------------|----------------------------|----------------------|
| Age, years                     | Mean (SD)                  | 25.5 (5.9)           |
| Birthplace, region n (%)       | Momase                     | 295 (88.1)           |
|                                | New Guinea Island          | 19 (5.7)             |
|                                | Highlands                  | 16 (4.8)             |
|                                | Southern Region            | 5 (1.5)              |
| Marital status, n (%)          | Married                    | 299 (89.3)           |
|                                | Single                     | 29 (8.7)             |
|                                | Divorced/separated/widowed | 3 (0.9)              |
|                                | Missing                    | 4 (1.2)              |
| Chew betelnut, n (%)           | Currently chew             | 281 (83.9)           |
|                                | Previously chew            | 5 (1.5)              |
|                                | Never chew                 | 49 (14.6)            |
| Drink alcohol, n (%)           | Currently drink            | 6 (1.8)              |
|                                | Previously drink           | 31 (9.3)             |
|                                | Never drink                | 298 (89.0)           |
| Smoke cigarettes, n (%)        | Currently smoke            | 81 (24.2)            |
|                                | Previously Smoke           | 34 (10.2)            |
|                                | Never smoke                | 220 (65.7)           |



|                                  |               |                |
|----------------------------------|---------------|----------------|
| Parity, n (%)                    | 0             | 147 (43.9)     |
|                                  | 1-3           | 141 (42.1)     |
|                                  | ≥ 4           | 47 (14.0)      |
| Current pregnancy, n (%)         | Singleton     | 325 (97.0)     |
|                                  | Twin          | 10 (3.0)       |
| Gestation in weeks, median (IQR) | USS           | 22 (19.0-24.0) |
|                                  | Fundal height | 22 (19.0-24.0) |
|                                  | LMP           | 20 (17.0-23.0) |
| HIV test result, n (%)           | Positive      | 2 (0.6)        |
|                                  | Negative      | 323 (96.4)     |
|                                  | Not tested    | 10 (3.0)       |
| Syphilis test result, n (%)      | Positive      | 42 (12.5)      |
|                                  | Negative      | 293 (87.5)     |
| Haemoglobin, g/dL                | Mean (SD)     | 8.6 (1.6)      |
| Haemoglobin, category            | ≥ 10 g/dL     | 59 (17.6)      |
|                                  | 7.0-9.9 g/dL  | 214 (63.9)     |
|                                  | < 7.0 g/dL    | 46 (13.7)      |
|                                  | Missing       | 16 (4.8)       |

195 Abbreviations: cm, centimetres; g/dL, grams per decilitre; HIV, human immunodeficiency virus; IQR,  
 196 interquartile range; LMP, last menstrual period; N, total number of participants; n, number of  
 197 participants in a category; SD, standard deviation; USS, ultrasound scan.

198 Table 2 describes the characteristics of the 342 babies. Most babies (330/342, 96.5%) were born by  
 199 normal vaginal birth at a health facility (72.8%; 249/342), with 27.2% (93/342) births taking place at  
 200 home or before arrival at a health facility.

201 Birth weight was normally distributed (mean 2.8 kg, SD 0.4), with a high frequency of birth weights  
 202 recorded as 2.50 kg (known as digit preference or heaping, supplement S1 Fig S2 Fig).

203

204 **Table 2. Characteristics of newborn babies in the study (N=342)**

| Newborn characteristic |                                        | Total N = 342 |        |
|------------------------|----------------------------------------|---------------|--------|
| Place of birth, n (%)  | Health facility                        | 249           | (72.8) |
|                        | Born before arrival at health facility | 5             | (1.5)  |
|                        | Home/village                           | 88            | (25.7) |
| Type of birth, n (%)   | Normal vaginal birth                   | 330           | (96.5) |

|                                 |                                       |      |           |
|---------------------------------|---------------------------------------|------|-----------|
|                                 | Caesarean section                     | 3    | (0.9)     |
|                                 | Assisted birth                        | 9    | (2.6)     |
| Sex, n (%)                      | Male                                  | 177  | (51.8)    |
|                                 | Female                                | 165  | (48.3)    |
| Birth weight, kg                | Mean (SD)                             | 2.8  | (0.40)    |
|                                 | Median (IQR)                          | 2.8  | (2.5-3.1) |
|                                 | Range, lowest-highest                 |      | 1.3-4.2   |
| Birth weight category n (%)     | LBW (< 2.50 kg)                       | 72   | (21.0)    |
|                                 | Normal birth weight ( $\geq$ 2.50 kg) | 270  | (79.0)    |
| Gestational age at birth, weeks | Mean (SD)                             | 38.8 | (1.8)     |
|                                 | Median (IQR)                          | 39   | (38-40)   |
|                                 | Range, lowest-highest                 |      | 30-42     |
| Gestational age category n (%)  | Preterm < 37 weeks                    | 25   | (7.3)     |
|                                 | Term $\geq$ 37 weeks                  | 317  | (91.7)    |
| Foot length, cm                 | Mean (SD)                             | 7.8  | (0.5)     |
|                                 | Median (IQR)                          | 7.8  | (7.5-8.0) |
|                                 | Range, lowest-highest                 |      | 5.8-8.9   |

205 Abbreviations: IQR, interquartile range; LBW, low birth weight; N, total number of  
 206 participants; n, number of participants in a category; SD, standard deviation.

207 Fig 3 shows scatterplots of birth weight, gestational age at birth and the foot length measured by the  
 208 researcher. About one-fifth of all babies (21.1%, 72/342), were LBW (<2.50 kg). The mean  
 209 gestational at birth was 38.8 weeks (SD 1.8) and 7.3% (25/342) were preterm. Of the babies born  
 210 preterm (<37 completed weeks of gestation), 5/25 babies were of normal weight ( $\geq$ 2.50 kg) and  
 211 amongst 317 babies born at term, 52 babies had a birth weight <2.50 kg (Fig 3). Mean foot length  
 212 was 7.8 cm (SD 0.5) with no adverse events recorded as a result of measurement.

213

214 **Fig.3. Scatter plots of newborn measurements recorded within 72 hours of birth for 342**

215 **babies.** Panel A. Birth weight and foot length; B. gestational age at birth and foot length; C.

216 gestational age at birth and birth weight. r, Pearson correlation coefficient. Reference lines in

217 red indicate the cut-offs for low birth weight (2.50 kg) and preterm birth (37 completed

218 weeks of gestation).

219

## 220 **Optimal foot length cut-offs for classifying LBW and PTB**

221 The receiver operating curves summarise the overall accuracy of foot length measurement  
 222 for the classification of newborn babies as LBW or PTB (Fig 4) at cut-off increments of 1 mm. The  
 223 overall area under the curve for foot length was 87.0% (95% CI, 82.3-91.6) for LBW and 85.8% (77.1-  
 224 94.6) for PTB.

225 **Fig. 4. Receiver operating characteristics curves of the accuracy of foot length for the classification**  
 226 **of outcomes in 342 newborn babies.** Panel A, low birth weight, B preterm birth.

227 Optimal foot length cut-offs for the classification of LBW and PTB were determined as the value with  
 228 the combination of the highest sensitivity and specificity (Table 3, supplement S1 Table, S2 Table).  
 229 The optimal foot length cut-off for identifying LBW was <7.7 cm. At this foot length, 61/72 babies  
 230 were correctly classified as LBW (sensitivity 84.7%, 74.7-91.2). The birth weights of 11 babies with  
 231 foot length ≥7.7 cm, who were incorrectly classified as being of normal birth weight (false negatives),  
 232 ranged from 2.15-2.43 kg. Among all babies with foot length <7.7 cm, 42.7 (34.8-50.9) were LBW  
 233 (positive predictive value). The negative predictive value was 94.5% (90.4-96.9).

234 **Table 3. Diagnostic accuracy statistics at the optimal foot length cut-off for classification of babies**  
 235 **as low birth weight or preterm**

| Outcome                         | <7.7 cm | ≥ 7.7 cm | Sensitivity,<br>% (95% CI) | Specificity,<br>% (95% CI) | Positive<br>predictive value,<br>% (95% CI) | Negative<br>predictive value,<br>% (95% CI) |
|---------------------------------|---------|----------|----------------------------|----------------------------|---------------------------------------------|---------------------------------------------|
| <b>Birth weight</b>             |         |          |                            |                            |                                             |                                             |
| < 2.50 kg                       | 61      | 82       | 84.7                       | 69.6                       | 42.7                                        | 94.5                                        |
| ≥ 2.50 kg                       | 11      | 188      | (74.7-91.2)                | (63.9-74.8)                | (34.8-50.9)                                 | (90.4-96.9)                                 |
| <b>Gestational age at birth</b> |         |          |                            |                            |                                             |                                             |
| < 37 weeks                      | 22      | 121      | 88.0                       | 61.8                       | 15.4                                        | 98.5                                        |
| ≥ 37 weeks                      | 3       | 196      | (70.0 – 95.8)              | (56.4 – 67.0)              | (10.4 – 22.2)                               | (95.7 – 99.5)                               |

236 The optimal foot length cut-off for PTB was <7.7 cm (Table 3), with 22/25 babies correctly classified  
237 (sensitivity 88.0%, 70.0-95.8). Of the 3 preterm babies not identified as PTB at this cut-off (false  
238 negatives), 2 were born at 36 weeks and 1 at 35 weeks gestation; none was very (28-32 weeks) or  
239 extremely (<28 weeks) preterm. At this cut-off, 121 babies were false positives, being born at term  
240 but with foot length <7.7 cm. The positive predictive value of a foot length of <7.7 cm was 15.4%  
241 (10.4-22.2) and negative predictive value 98.5% (95.7-99.5).

242 Foot length measurements from both the researcher and a volunteer were available for 123 babies.  
243 Values at full or half centimetre marks were over-represented for both sets of average  
244 measurements (S2 Fig). Fig 5 shows the Bland-Altman plot, displaying the differences between the  
245 123 paired measurements against the average of the measurements of the researcher and  
246 volunteer. The mean difference between researcher and volunteer measurements (dashed line) was  
247 0.07 cm. The 95% limits of agreement ranged from -0.55 cm to +0.70 cm. Differences between  
248 measurements for 9/123 (7.3%) of the data pairs were outside the 95% limits of agreement.

249

250 **Fig 5. Bland-Altman plot for researcher and volunteers' newborn foot length measurements**

251 **(N=123)**. Size of circle is proportional to number of measurements.

252

## 253 Discussion

### 254 Summary of main findings

255 This prospective study enrolled 342 newborn babies in Madang Province, PNG. Overall, 21.1%  
256 (72/342) of newborns were LBW and 7.3% (25/342) were born preterm. The optimal foot length cut-  
257 off to classify LBW babies was <7.7 cm (sensitivity 84.7%, 95% CI 74.7-91.2, specificity 69.6%, 63.9-  
258 74.8) and <7.7 cm to classify PTB (sensitivity 88.0%, 70.0-95.8, specificity 61.8%, 56.4-67.0%). The

259 95% limits of agreement between researcher and volunteer measurements were from -0.55 to +  
260 0.70 cm and 7.3% (9/123) of the pairs were outside these limits.

## 261 **Strengths and limitations**

262 Strengths of this study included the use of accurate methods for determination of the reference  
263 standards for measuring birth weight and gestational age at birth. All babies were weighed twice  
264 using electronic scales [27] and gestational age at birth was calculated using published  
265 recommendations for the best obstetric estimate of the delivery date, which are based on the date  
266 of the last menstrual period and an ultrasound scan at the first antenatal visit [26]. Foot length was  
267 measured using items readily available in the community and the study involved trained volunteers  
268 from communities, with babies assessed at local health centres or at home. Also, the target sample  
269 size was reached, and outcome variables LBW and PTB were available for all babies in the study,  
270 even though a COVID-19 lock down was in place for part of the study.

271 There were also limitations of the study methods. First, the measurement of birth weight was taken  
272 within the first 72 hours of birth. Ideally, birth weight should be measured within a few hours of  
273 birth, before any postnatal weight loss has occurred [27]. However, Marchant et al. found that foot  
274 length increased by only 0.2 cm (SD 0.3) between the first and fifth day after birth in a study in  
275 Tanzania [10], so the delay of up to 72 hours in our study should not have affected the results.

276 Second, the researcher and volunteers could not be blinded from the clinical status of the newborn,  
277 which might have influenced their foot length measurements. Knowledge of birthweight could have  
278 resulted in overestimation of the accuracy of classification of LBW. Since the overall areas under the  
279 curve for LBW and PTB were similar, we think risk of bias was low. Third, whilst mothers were  
280 enrolled at primary care clinics and most gave birth at a health centre or at home/village, the study  
281 was done in only one coastal province of PNG. The 2020 PNG National Department of Health Sector  
282 Review Performance found that Madang Province was one of the provinces with the highest

283 percentage of low birth weight babies (13% in 2020) [21]. Optimal foot length cut-off values might  
284 be different in other regions of PNG or other Pacific islands.

## 285 **Comparison with other studies**

286 Our study from PNG in the Pacific region adds to the evidence from previously published studies that  
287 have explored foot length as a proxy to identify LBW and PTB and were conducted in countries in  
288 Asia and Africa. The levels of LBW (around 20%) and PTB (around 7%) in the Neofoot study were  
289 similar to those of several other published studies that have assessed the diagnostic accuracy of foot  
290 length both in sub-Saharan Africa [10,15] and south Asia [29]. Our study in PNG, however, overcame  
291 limitations of assessment of gestational age and of applicability of findings from tertiary care setting  
292 that were identified in previous studies [19]. The Neofoot study shared several characteristics with a  
293 study by Lee et al. among 710 babies in the community in Bangladesh, but with different findings  
294 about the accuracy of foot length as a method to identify PTB [29]. Both studies were nested in  
295 randomised controlled trials, the investigators assessed babies within 72 hours after birth, estimated  
296 gestational age based on ultrasound scan and used a clear plastic ruler to measure foot length. Lee  
297 et al. found that foot length measured at home visits by trained community health workers did not  
298 classify PTB well, with an overall area under the curve of 51.9% and sensitivity at a cut-off of <7.7 cm  
299 of 28%. In contrast, we found an overall area under the curve of 85.6% and sensitivity of 88.0% for  
300 the same cut-off. Lee et al. attributed the poor performance of foot length (and other  
301 anthropometric measurements) to the high level of foetal growth restriction (32.4% of babies were  
302 assessed as being small for gestational age). In our study, however, levels of PTB and mean birth  
303 weight were similar to those of Lee et al. and 12.3% (42/342) of term babies were LBW. One factor  
304 that might have contributed to the different findings was that all babies in Lee et al.'s study were  
305 assessed at home by community health workers, whilst more babies in our study were assessed at a  
306 health facility or community by a paediatrician researcher, where the conditions for measuring foot  
307 length might have been easier. Given the study setting, the proportion of supervised deliveries in

308 our study population was higher than the average for Madang Province [21]. Our study could be  
309 repeated among women who do not give birth at a health facility to assess the performance of foot  
310 length measurement by a community health worker.

## 311 **Interpretation of the findings**

312 In the Neofoot study, a foot length cut-off of <7.7 cm had similarly high overall accuracy for  
313 classification of LBW and PTB (Table 3). A common cut-off for identifying LBW and PTB was also  
314 found by Paulsen et al. ( $\leq 7.7$  cm) [30] and Marchant et al. (<8 cm) in Tanzania [10]. The cut-off of  
315 <7.7 cm for LBW concurs with the pooled result from the meta-analysis of 15 studies by Folger et al.,  
316 which included studies from a range of countries [19]. The lower prevalence of PTB, compared with  
317 LBW, results in a lower positive predictive value. At the optimal foot-length cut-off, around 15% of  
318 babies were preterm, according to the reference standard (compared with nearly half of babies  
319 classified as LBW). The referral of substantial numbers of babies for urgent care would increase the  
320 workload for health systems and should be assessed. The use of a plastic ruler was an appropriate  
321 technology for the measurement of foot length and taking the average of two measurements should  
322 have reduced error, although we still observed digit preference for measurements at the half or full  
323 centimetre (S2 Fig). A single training session for lay people and health facility staff to measure foot  
324 length resulted in average foot length measurements that were similar to those of the researcher,  
325 but paired measurements for individual babies differed by up to 1 cm. These findings were  
326 comparable to those of Marchant et al. who assessed 142 paired measurements, using a plastic  
327 ruler, between researchers and community volunteers in Tanzania [11]. As in our study, they found  
328 no overall bias but volunteers' measurements were shorter than those of researchers.

## 329 **Implications for research and practice**

330 The goal of universal health coverage to ensure that all sick and small newborns survive and thrive  
331 will take time to achieve; in the meantime, there is a need for innovative ways to simplify

332 assessment of gestational age at birth [2]. The findings of this study have implications for future  
333 research and practice in settings such as PNG, where it is difficult to identify high risk babies in  
334 populations with rural communities, high levels of home births and limited access to health facilities  
335 with skilled staff and equipment. Most women in PNG attend antenatal clinic late in pregnancy,  
336 often in the last trimester, so assessment of gestational age at birth is particularly challenging. Even  
337 though the Neofoot study was nested in a trial following Good Clinical Practice guidelines, with  
338 ultrasound-assisted pregnancy dating and efforts to encourage supervised delivery, more than a  
339 quarter of women did not give birth at a health facility. Most of these women lived in hamlets, which  
340 are an hour or more from the main road by foot, and from which access to the labour ward at the  
341 health centre was difficult, especially at night. In settings such as these, validation of newborn  
342 footlength as a surrogate for LBW and PTB is important. Our study adds to the published evidence  
343 [19], showing that both LBW and PTB can be classified accurately and could be used by trained  
344 health workers and community health volunteers. Newborn foot length has not, however, been  
345 widely implemented. Implementation research studies should develop appropriate technologies to  
346 apply optimal cut-off measurements, training programmes that reduce misclassification from digit  
347 preference (heaping) and examine the impacts on referrals to health systems and health outcomes.  
348 In this study in PNG, newborn foot length was a simple and feasible method for the identification of  
349 LBW and PTB babies and could help to improve neonatal health outcomes.

350

## 351 **Acknowledgments**

352 This study was conducted during the Master of Medical Sciences, University of Papua New  
353 Guinea of Alice Mengi. We sincerely thank all the parents of the 342 babies that participated, the  
354 PNG Institute of Medical Research and WANTAIM staff, especially Kelly Masil for scanning and  
355 verification of data and Andrew Vallely and William Pomat for acquisition of funding and oversight of



356 the WANTAIM trial. We thank Odile Stalder at the Clinical Trials Unit, University of Bern, who helped  
357 with the statistical analyses. We thank Sister Hilda Marijembi, Sister Susie Yuangi, Naida Samson,  
358 Sister Bridegette Nawali, Lina Puli, Josephine Fei, Christophilda Noubiri and Alvita Jimmy for  
359 assistance with data collection.

360

## 361 **References**

- 362 1. Lawn J, Blencowe H, Oza S, You D, Lee AC, Waiswa P, et al. Every Newborn: Progress,  
363 Priorities, and Potential Beyond Survival. *Lancet*. 2014;384:189-205.
- 364 2. UNICEF WHO. Survive and Thrive: Transforming Care for Every Small and Sick Newborn:  
365 Geneva: World Health Organization; 2019 [Access Date; cited 2022 6/11/2022]. Available from:  
366 <https://www.who.int/publications/i/item/9789241515887>.
- 367 3. World Health Organization. Newborns with Low Birth Weight (%) 2006 [Access Date; cited  
368 2021 15/5/2021]. Available from:  
369 <https://www.who.int/whosis/whostat/2006NewbornsLowBirthWeight.pdf>.
- 370 4. World Health Organization. Preterm Birth 2018 [Access Date; cited 2021 15/5/2021].  
371 Available from: <https://www.who.int/news-room/fact-sheets/detail/preterm-birth>.
- 372 5. Blanc AK, Wardlaw T. Monitoring Low Birth Weight: An Evaluation of International Estimates  
373 and an Updated Estimation Procedure. *Bulletin of the World Health Organization*. 2005;83(3):178-  
374 85. PubMed Central PMCID: 15798841.
- 375 6. Lee A, Panchal P, Folger LV, Whelan H, Whelan R, Rosner B, et al. Diagnostic Accuracy of  
376 Neonatal Assessment for Gestational Age Determination: A Systematic Review. *Pediatrics*. 2017;140.
- 377 7. Ashish KC, Nelin V, Vitrakoti R, Aryal S, Målqvist M. Validation of the Foot Length Measure as  
378 an Alternative Tool to Identify Low Birth Weight and Preterm Babies in a Low-Resource Setting Like  
379 Nepal: A Cross-Sectional Study. *BMC Pediatr*. 2015;15:43. Epub 2015/05/01. doi:  
380 <https://doi.org/10.1186/s12887-015-0361-4>. PubMed PMID: 25928804; PubMed Central PMCID:  
381 PMC4403672.

- 382 8. Feresu SA, Harlow SD, Gillespie BW, Welch K, Johnson TR. Birthweight-Adjusted Dubowitz  
383 Methods: Reducing Misclassification of Assessments of Gestational Age in a Zimbabwean  
384 Population. *The Central African journal of medicine*. 2003;49(5-6):47-53. PubMed PMID: 15214282.
- 385 9. Hadush MY, Berhe A, Medhanyie A. Foot Length, Chest and Head Circumference  
386 Measurements in Detection of Low Birth Weight Neonates in Mekelle, Ethiopia: A Hospital Based  
387 Cross Sectional Study. *BMC Pediatrics*. 2017;17.
- 388 10. Marchant T, Jaribu J, Penfold S, Tanner M, Schellenberg JA. Measuring Newborn Foot Length  
389 to Identify Small Babies in Need of Extra Care: A Cross Sectional Hospital Based Study with  
390 Community Follow-up in Tanzania. *BMC Public Health*. 2010;10(1):624. doi: 10.1186/1471-2458-10-  
391 624.
- 392 11. Marchant T, Penfold S, Mkumbo E, Shamba D, Jaribu J, Manzi F, et al. The Reliability of a  
393 Newborn Foot Length Measurement Tool Used by Community Volunteers to Identify Low Birth  
394 Weight or Premature Babies Born at Home in Southern Tanzania. *BMC Public Health*.  
395 2014;14(1):859. doi: 10.1186/1471-2458-14-859.
- 396 12. Mukherjee S, Roy P, Mitra S, Samanta M, Chatterjee S. Measuring New Born Foot Length to  
397 Identify Small Babies in Need of Extra Care: A Cross-Sectional Hospital Based Study. *Iranian journal of*  
398 *pediatrics*. 2013;23(5):508-12. PubMed PMID: 24800008.
- 399 13. Nabiwemba E, Marchant T, Namazzi G, Kadobera D, Waiswa P. Identifying High-Risk Babies  
400 Born in the Community Using Foot Length Measurement at Birth in Uganda. *Child Care Health Dev*.  
401 2013;39(1):20-6. doi: 10.1111/j.1365-2214.2012.01383.x. PubMed PMID: 22680250.
- 402 14. Nabiwemba E, Orach C, Kolsteren P. Determining an Anthropometric Surrogate Measure for  
403 Identifying Low Birth Weight Babies in Uganda: A Hospital-Based Cross Sectional Study. *BMC Pediatr*.  
404 2013;13:54. Epub 2013/04/17. doi: 10.1186/1471-2431-13-54. PubMed PMID: 23587297; PubMed  
405 Central PMCID: PMC3639798.
- 406 15. Otupiri E, Wobil P, Nguah SB, Hindin MJ. Anthropometric Measurements: Options for  
407 Identifying Low Birth Weight Newborns in Kumasi, Ghana. *PloS one*. 2014;9(9):e106712-e. doi:  
408 10.1371/journal.pone.0106712. PubMed PMID: 25226505.
- 409 16. Pratinidhi AK, Bagade AC, Kakade SV, Kale HP, Kshirsagar VY, Babar R, et al. Action-Oriented  
410 Colour-Coded Foot Length Calliper for Primary Healthcare Workers as a Proxy for Birth Weight &

- 411 Gestational Period. *The Indian journal of medical research*. 2017;145(3):347-52. doi:  
412 10.4103/ijmr.IJMR\_36\_14. PubMed PMID: 28749397.
- 413 17. Singhal R, Jain S, Chawla D, Guglani V. Accuracy of New Ballard Score in Small-for-Gestational  
414 Age Neonates. *J Trop Pediatr*. 2017;63(6):489-94. Epub 2017/10/05. doi: 10.1093/tropej/fmx055.  
415 PubMed PMID: 28977559.
- 416 18. Thi HN, Khanh DK, Thu Hle T, Thomas EG, Lee KJ, Russell FM. Foot Length, Chest  
417 Circumference, and Mid Upper Arm Circumference Are Good Predictors of Low Birth Weight and  
418 Prematurity in Ethnic Minority Newborns in Vietnam: A Hospital-Based Observational Study. *PLoS*  
419 *One*. 2015;10(11):e0142420. doi: 10.1371/journal.pone.0142420. PubMed PMID: 26555356;  
420 PubMed Central PMCID: PMC4640656.
- 421 19. Folger LV, Panchal P, Eglovitch M, Whelan R, Lee AC. Diagnostic Accuracy of Neonatal Foot  
422 Length to Identify Preterm and Low Birthweight Infants: A Systematic Review and Meta-Analysis.  
423 *BMJ Global Health*. 2020;5(11):e002976. doi: 10.1136/bmjgh-2020-002976.
- 424 20. Hirve SS, Ganatra BR. Foot Tape Measure for Identification of Low Birth Weight Newborns.  
425 *Indian Pediatr*. 1993;30(1):25-9. Epub 1993/01/01. PubMed PMID: 8406702.
- 426 21. Papua New Guinea National Department of Health. Sector Performance Annual Review:  
427 Assessment of Sector Performance 2016-2020. National Report, August 2021. Port Moresby 2021.
- 428 22. The World Bank Data. Mortality Rate, Neonatal (Per 1,000 Live Births) - Papua New Guinea  
429 2019 [Access Date; cited 2021 15/5/2021]. Available from:  
430 <https://data.worldbank.org/indicator/SH.DYN.NMRT?locations=PG>.
- 431 23. Emori R, Vallely AJ, Gouda H, Siba P, Phuanukoonnon S, Mola G, et al. Supervised and  
432 Unsupervised Birth and Early Newborn Care Practices in Papua New Guinea: Findings of a Maternal  
433 and Infant Health Survey Conducted in Three Provinces. *Papua New Guinea Medical Journal*.  
434 2017;60(1/2):27-40. doi: 10.3316/informit.301803940285652.
- 435 24. Papua New Guinea National Statistical Office. The 2011 National Population and Housing  
436 Census, Ward Population: Momase Region: National Statistical office; 2014 [Access Date; cited  
437 2022]. Available from: [https://sdd.spc.int/collection/2011-population-and-housing-census-](https://sdd.spc.int/collection/2011-population-and-housing-census-collection-papua-new-guinea)  
438 [collection-papua-new-guinea](https://sdd.spc.int/collection/2011-population-and-housing-census-collection-papua-new-guinea).

- 439 25. Valley AJ, Pomat WS, Homer C, Guy R, Luchters S, Mola GDL, et al. Point-of-Care Testing and  
440 Treatment of Sexually Transmitted Infections to Improve Birth Outcomes in High-Burden, Low-  
441 Income Settings: Study Protocol for a Cluster Randomized Crossover Trial (the Wantaim Trial, Papua  
442 New Guinea). *Wellcome open research*. 2019;4:53-. doi: 10.12688/wellcomeopenres.15173.2.  
443 PubMed PMID: 32030356.
- 444 26. Committee Opinion No 700: Methods for Estimating the Due Date. *Obstet Gynecol*.  
445 2017;129(5):e150-e4. Epub 2017/04/21. doi: 10.1097/aog.0000000000002046. PubMed PMID:  
446 28426621.
- 447 27. Cutland CL, Lackritz EM, Mallett-Moore T, Bardaji A, Chandrasekaran R, Lahariya C, et al. Low  
448 Birth Weight: Case Definition & Guidelines for Data Collection, Analysis, and Presentation of  
449 Maternal Immunization Safety Data. *Vaccine*. 2017;35(48 Pt A):6492-500. Epub 2017/11/19. doi:  
450 10.1016/j.vaccine.2017.01.049. PubMed PMID: 29150054; PubMed Central PMCID: PMC5710991.
- 451 28. Bland JM, Altman DG. Statistical Methods for Assessing Agreement between Two Methods  
452 of Clinical Measurement. *Lancet*. 1986;1(8476):307-10. Epub 1986/02/08. PubMed PMID: 2868172.
- 453 29. Lee A, Mullany L, Ladhani K, Uddin J, Mitra D, Ahmed P, et al. Validity of Newborn Clinical  
454 Assessment to Determine Gestational Age in Bangladesh. *Pediatrics*. 2016;138.
- 455 30. Paulsen C, Nielsen BB, Msemo O, Møller SL, Ekmann JR, Theander T, et al. Anthropometric  
456 Measurements Can Identify Small for Gestational Age Newborns: A Cohort Study in Rural Tanzania.  
457 *BMC Pediatrics*. 2019;19(1):120.

458

## 459 **Supporting information**

460 **S1 Checklist. Standards of Reporting of Diagnostic accuracy studies 2015 checklist.**

461 (<https://www.equator-network.org/reporting-guidelines/stard/>)

462 **S1 Fig. Bar chart of birth weight, measured on electronic scales (N=342).**

463 **S2 Fig. Bar chart of foot length measurements, average of two measurements with a plastic ruler.**

464 Panel A, researcher (N=342), B, volunteer (N=123).

465 **S1 Table. Receiver operating curve statistics for accuracy of newborn foot length to classify low**  
466 **birth weight, 1 mm increments (N=342).** Abbreviations: CI, confidence interval; LHR, likelihood ratio;  
467 PV, predictive value.

468 **S2 Table. Receiver operating curve statistics for accuracy of newborn foot length to classify**  
469 **preterm birth, 1 mm increments (N=342).** Abbreviations: CI, confidence interval; LHR, likelihood  
470 ratio; PV, predictive value.

471 **S1 Protocol. Neofoot study protocol approved by the Papua New Guinea Institute of Medical**  
472 **Research.**

Cardboard box

15 cm plastic ruler

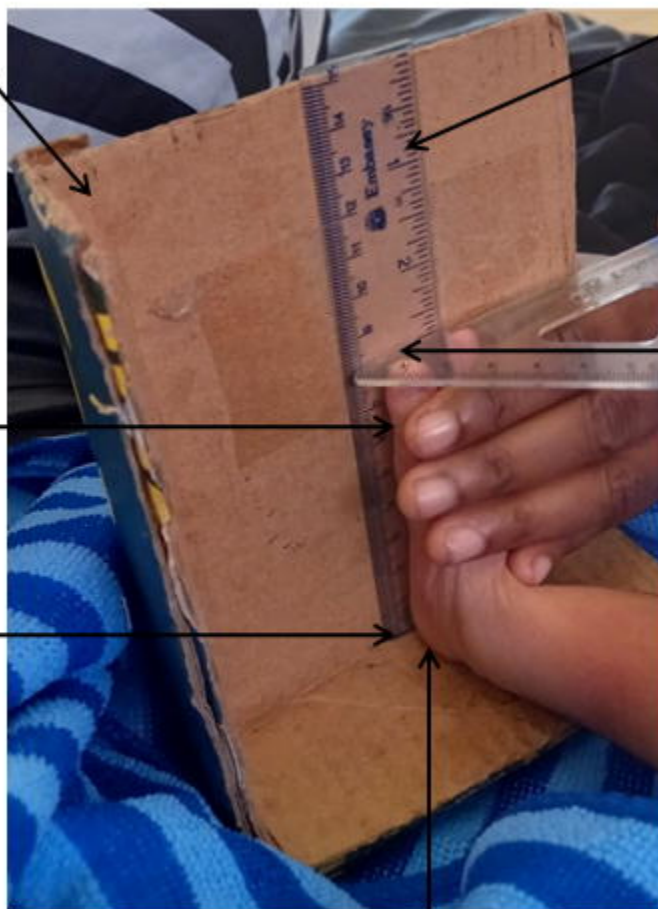

Hallux (big toe)

Clear plastic set square at tip of hallux

Zero cm mark of ruler at base of box

Heel at base of box

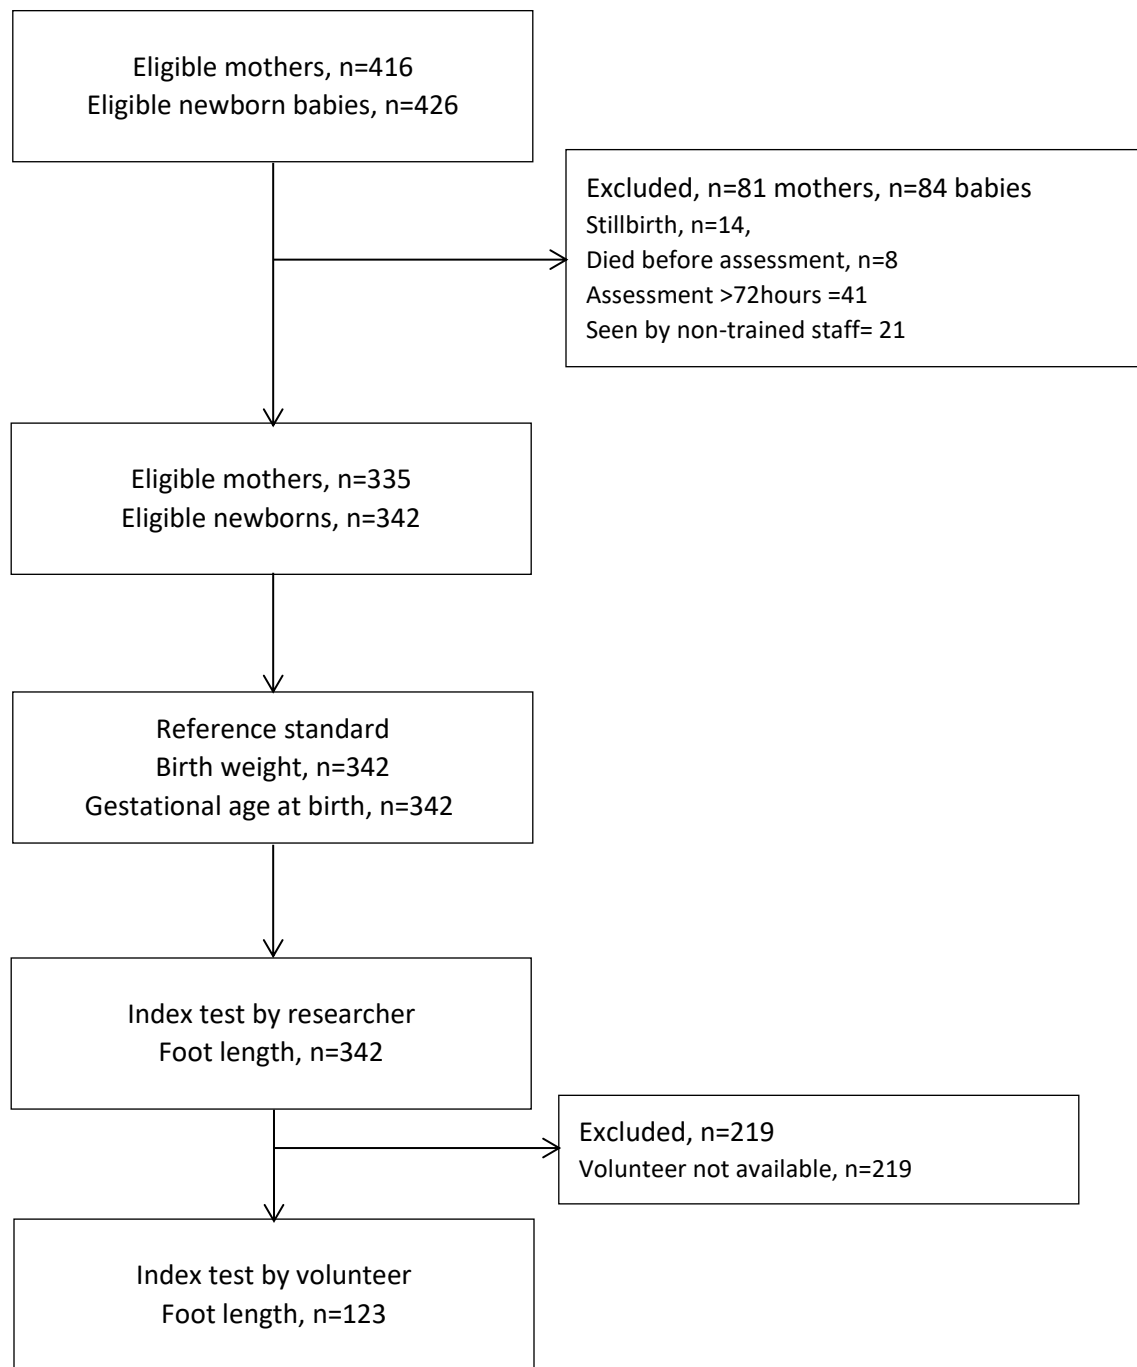

**Fig. 2.** Flow chart indicating number of mothers and newborn babies at each stage of the Neofoot study.

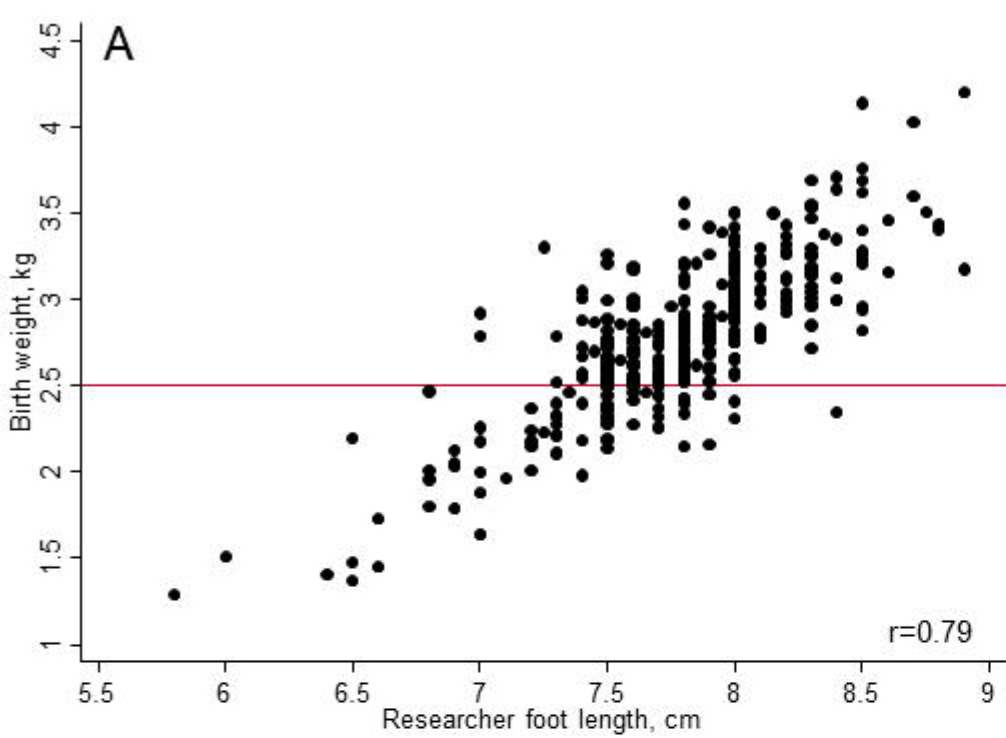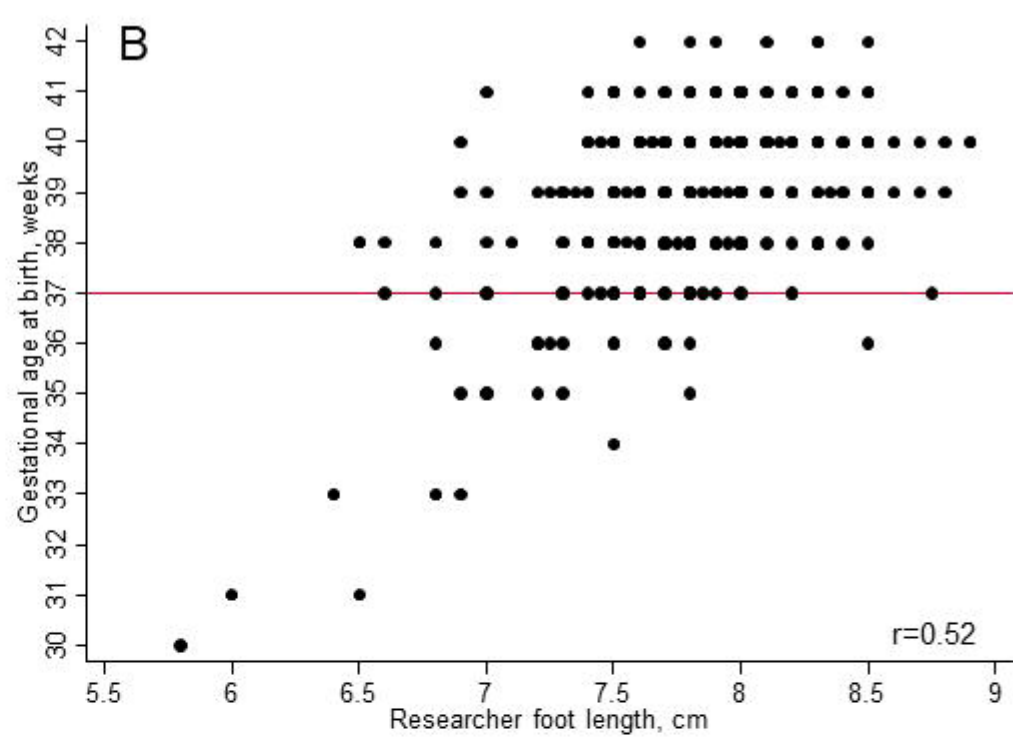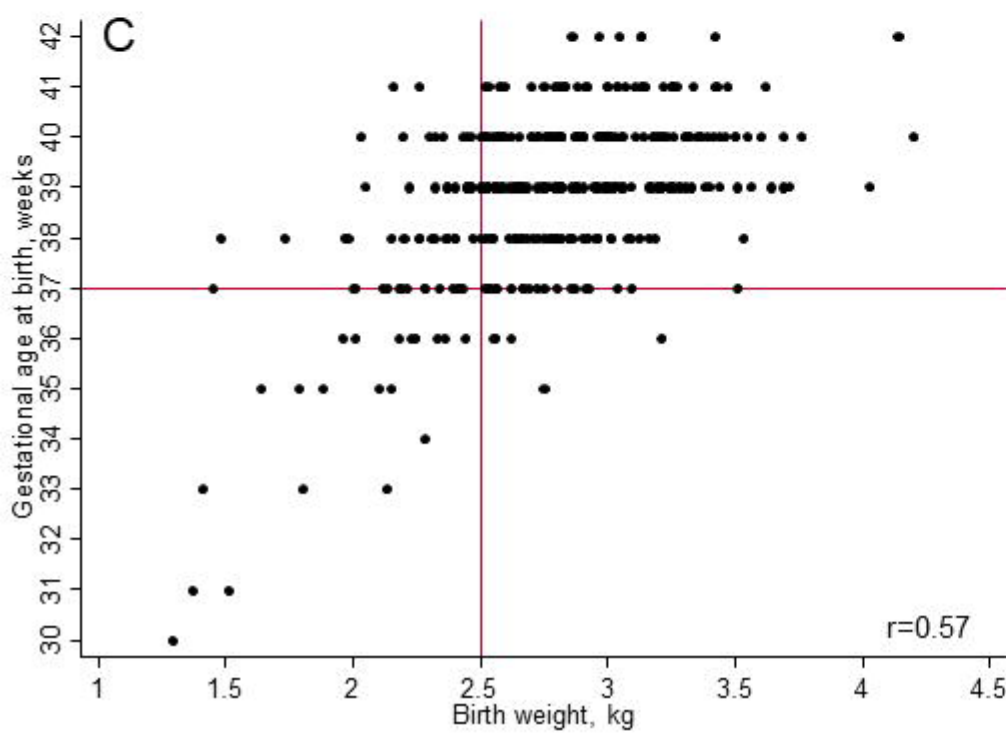



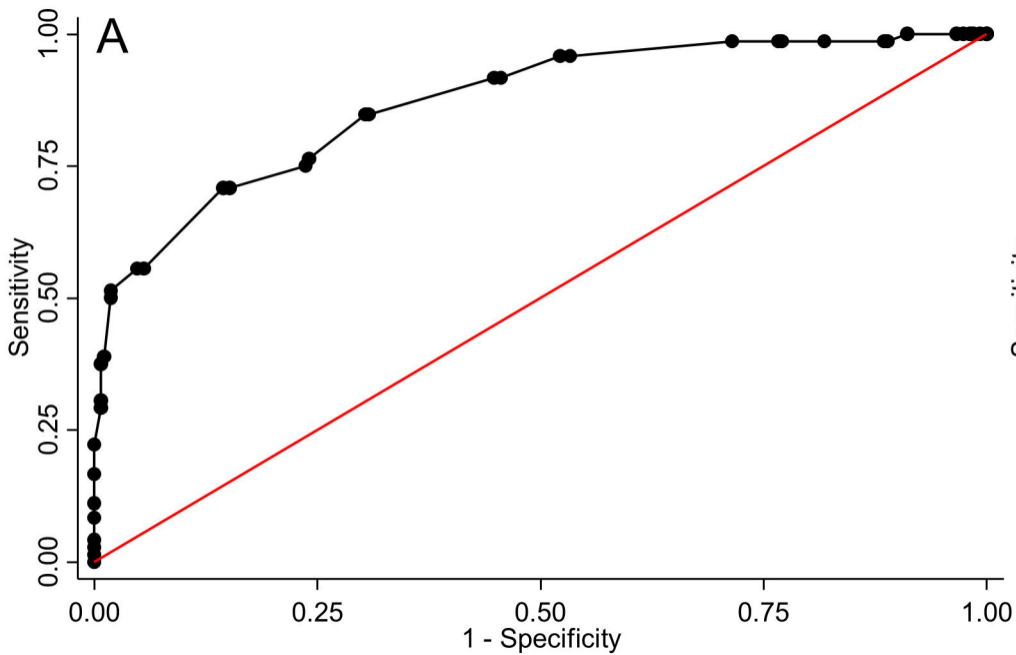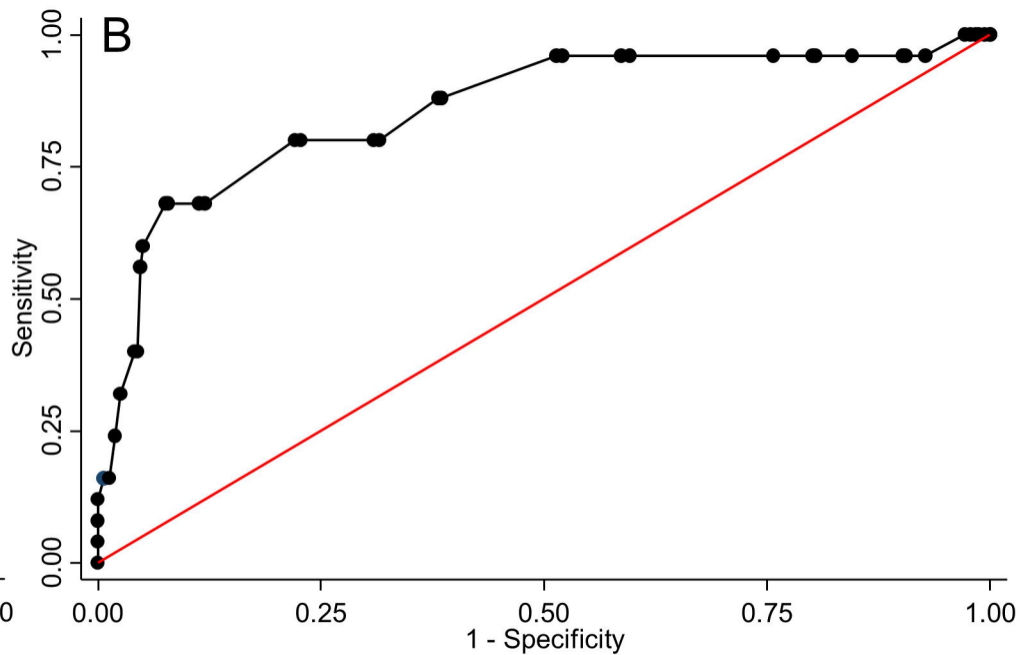

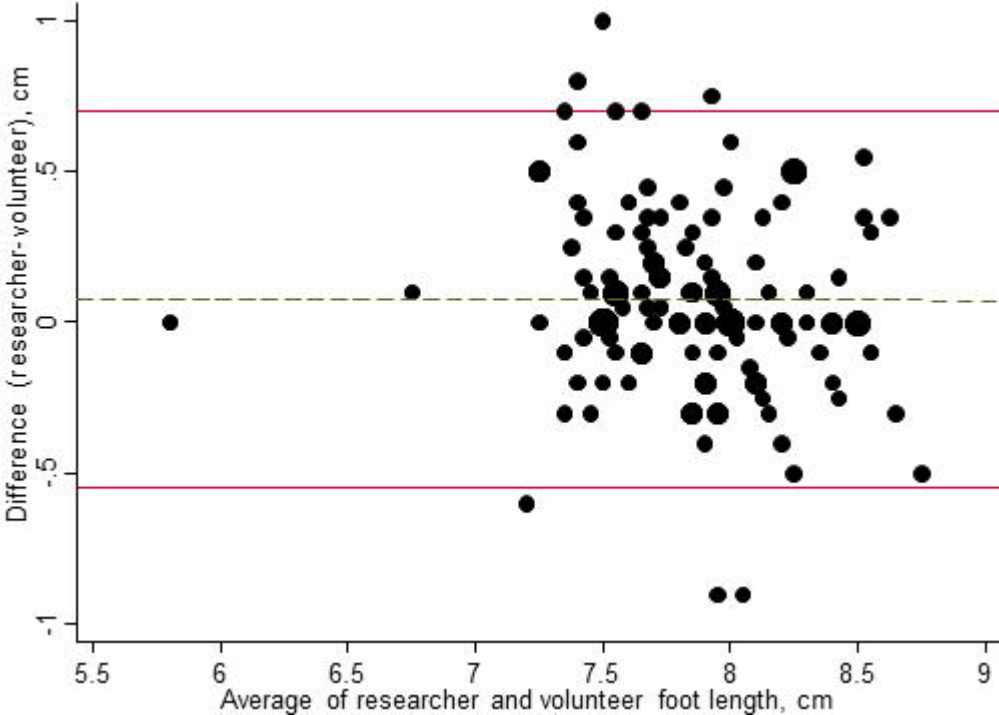

Source: https://medrxiv.org/content/10.1101/2023.01.04.23284192v2.full.pdf
